# Supplementary material
Source: publisher site journal article supplement (https://www.spandidos-publications.com/4566/downloadSupplementary)
Supplement: Supplementary file 1 [file downloadSupplementary]

## Sheet: Sheet1
Table SII. List of inflammation-associated genes.
Genes	Hazard ratio	95% Confidence Interval (lower)	95% Confidence Interval (upper)	P-value
ABCC1	0.982975	0.68119	1.41846	0.92688
ABCD1	1.9303	1.17769	3.16385	0.00908785
ABCD2	1.08741	0.514546	2.29808	0.82626
ABHD12	1.47459	0.904759	2.4033	0.119146
ABR	0.858587	0.574756	1.28258	0.456527
ACE	0.865027	0.6585	1.13633	0.297529
ACER3	1.02128	0.611971	1.70434	0.935779
ACKR1	0.883365	0.72126	1.0819	0.230559
ACKR2	0.988596	0.301	3.24692	0.984918
ACOD1	3.53552	0.267445	46.7382	0.337694
ACP5	0.901344	0.752365	1.07982	0.259815
ADA	1.27721	1.03623	1.57425	0.0218171
ADAM8	1.92618	1.41605	2.62008	2.96624e-05
ADAM17	0.730608	0.476191	1.12095	0.150669
ADAMTS12	1.37384	0.935592	2.01737	0.105164
ADCY1	0.42385	0.225585	0.796367	0.00764016
ADCY7	0.971673	0.648628	1.45561	0.88917
ADCY8	0.560588	0.381437	0.823883	0.00321821
ADCYAP1	0.361458	0.150435	0.868494	0.0228938
ADIPOQ	1.36998	0.781798	2.40067	0.271381
ADORA1	1.35216	1.05729	1.72928	0.0162248
ADORA2A	1.26388	0.379066	4.21402	0.70309
ADORA2B	1.80092	1.19609	2.71161	0.00483985
ADRA2A	1.20226	0.929895	1.55441	0.159896
ADRB2	0.365792	0.180943	0.73948	0.00510472
AFAP1L2	0.920287	0.674969	1.25477	0.599465
AGER	1.52643	1.18648	1.96378	0.00100122
AGT	0.933452	0.811963	1.07312	0.333033
AGTR2	2.76895	0.43893	17.4676	0.278471
AHCY	1.08664	0.701084	1.68423	0.710171
AHSG	1.43699	1.01794	2.02855	0.0393006
AIF1	1.15482	0.906448	1.47125	0.244013
AIM2	1.52321	1.20836	1.92009	0.000368092
AIMP1	0.619243	0.302149	1.26912	0.190526
AK7	0.71571	0.403048	1.27092	0.25359
AKNA	1.12003	0.814082	1.54095	0.486214
AKT1	0.662566	0.405016	1.08389	0.101178
ALDH2	0.938363	0.670981	1.3123	0.710067
ALOX5	1.06711	0.886734	1.28417	0.491759
ALOX5AP	0.962914	0.727795	1.27399	0.791326
ALOX15	8.32046	2.18527	31.6804	0.00189661
ANKRD42	0.673894	0.350085	1.29721	0.237524
ANO6	0.785806	0.579752	1.06509	0.120299
ANXA1	0.89563	0.680221	1.17925	0.43228
AOAH	0.959168	0.749299	1.22782	0.740717
AOC3	0.902929	0.717859	1.13571	0.382913
AP3B1	0.339367	0.199042	0.578622	7.19761e-05
APOA1	1.32127	0.959799	1.81887	0.0875707
APOD	1.24581	1.01838	1.52404	0.0325942
APOE	1.11865	0.94685	1.32163	0.187505
APP	0.56868	0.441472	0.732541	1.24736e-05
APPL1	0.516022	0.333378	0.798728	0.00299542
APPL2	0.588346	0.380044	0.91082	0.0173651
AREL1	0.793524	0.462783	1.36064	0.40056
ASH1L	0.627977	0.449498	0.877322	0.00638851
ATM	0.880833	0.590387	1.31417	0.534205
ATRN	0.481712	0.316177	0.733913	0.000673717
AXL	1.14502	0.875047	1.49828	0.323615
B4GALT1	0.968833	0.699049	1.34273	0.849194
BAP1	0.881138	0.51445	1.50919	0.644871
BCL6	1.21609	0.868094	1.70359	0.255326
BCL6B	0.783939	0.628509	0.977807	0.0308488
BCR	0.52967	0.32597	0.860662	0.010294
BDKRB1	1.16189	0.796612	1.69467	0.435873
BDKRB2	0.920195	0.73494	1.15215	0.468368
BST1	0.748345	0.538692	1.03959	0.0839091
BTK	1.05403	0.732147	1.51743	0.777147
C1QA	1.1133	0.925762	1.33884	0.254128
C1QTNF3	0.977964	0.816507	1.17135	0.80875
C1QTNF12	1.37053	1.00231	1.87401	0.0483337
C2CD4A	1.19561	0.996531	1.43445	0.0545337
C2CD4B	1.40705	1.11411	1.77702	0.00414155
C3	1.05975	0.927113	1.21137	0.394955
C3AR1	0.918204	0.731026	1.15331	0.463154
C5AR1	1.05059	0.803793	1.37316	0.717924
C5AR2	0.382617	0.202183	0.724073	0.00315689
CALCA	0.973027	0.698013	1.3564	0.871829
CALCRL	0.664083	0.545875	0.807888	4.25722e-05
CAMK1D	0.576317	0.370386	0.896741	0.0145605
CAMK4	0.903323	0.344947	2.36556	0.836008
CAMP	0.678277	0.330343	1.39268	0.290243
CASP1	1.09527	0.791199	1.5162	0.583388
CASP4	1.7785	1.11531	2.83602	0.015591
CASP6	1.05987	0.565077	1.98792	0.856207
CASP12	0.756531	0.437341	1.30868	0.318353
CCL1	18.3011	1.31185	255.311	0.0306317
CCL2	1.1055	0.956601	1.27758	0.174192
CCL3	1.12916	0.906413	1.40665	0.278581
CCL4	1.12426	0.912379	1.38534	0.271643
CCL5	1.1461	0.98284	1.33648	0.081998
CCL7	2.53138	1.55169	4.12962	0.000199696
CCL8	1.48511	1.14669	1.92341	0.00272311
CCL11	1.8538	1.2953	2.65309	0.000739234
CCL17	1.37646	0.962763	1.96793	0.0797914
CCL19	1.20687	1.0726	1.35795	0.0017801
CCL20	1.04452	0.931299	1.17151	0.45681
CCL22	0.68898	0.397175	1.19517	0.184981
CCL24	0.707923	0.352463	1.42186	0.331657
CCL25	2.71677	1.02202	7.22182	0.0451104
CCL26	1.28758	1.04084	1.59283	0.0198751
CCR1	1.00441	0.794439	1.26988	0.970662
CCR2	1.07451	0.812443	1.42111	0.614393
CCR3	13.3017	0.690126	256.382	0.0864768
CCR4	0.847271	0.579858	1.23801	0.391695
CCR5	1.03156	0.838013	1.26981	0.769453
CCR6	0.384516	0.0989829	1.49372	0.167459
CCR7	1.02742	0.725435	1.45512	0.878915
CCRL2	0.646192	0.391517	1.06653	0.0876326
CD5L	0.75117	0.559564	1.00839	0.056861
CD6	1.07859	0.785592	1.48087	0.639922
CD14	1.24513	0.995667	1.55708	0.0546186
CD28	1.18901	0.812986	1.73896	0.3721
CD40	0.970725	0.701014	1.3442	0.858014
CD40LG	1.03879	0.69797	1.54604	0.85119
CD44	1.39705	1.10358	1.76855	0.00544946
CD47	1.16176	0.690955	1.95335	0.571705
CD68	1.23958	0.90907	1.69026	0.174644
CD81	0.899279	0.572249	1.4132	0.645287
CD96	1.14317	0.860141	1.51932	0.356577
CD163	0.929607	0.782889	1.10382	0.404908
CD180	0.822399	0.558152	1.21175	0.322788
CD200	0.790112	0.610814	1.02204	0.0728228
CD200R1	1.05409	0.766374	1.44982	0.746016
CD276	1.39783	0.894853	2.18353	0.141083
CD300A	1.1421	0.893933	1.45917	0.287794
CDH5	0.714571	0.579373	0.881318	0.00168617
CDK19	0.736404	0.538052	1.00788	0.0560104
CEBPA	0.971183	0.766895	1.22989	0.808264
CEBPB	1.38405	1.1123	1.7222	0.00356536
CELA1	1.66707	0.131015	21.2121	0.693718
CERS6	0.818304	0.56018	1.19537	0.299715
CFH	1.18407	0.990686	1.41521	0.0632951
CHID1	1.00795	0.575162	1.7664	0.977928
CHRNA7	1.18002	0.151345	9.20047	0.874477
CHST1	1.15283	0.94726	1.40302	0.15582
CHST2	1.04898	0.771013	1.42716	0.760807
CHST4	16.4445	3.30194	81.8981	0.000630333
CIITA	1.00694	0.755852	1.34143	0.962323
CLCF1	1.00197	0.774451	1.29632	0.988071
CLEC10A	1.00257	0.750712	1.33893	0.986123
CLOCK	0.599841	0.371557	0.968383	0.0364894
CLU	0.91802	0.771422	1.09248	0.335254
CMKLR1	0.85059	0.639394	1.13155	0.266445
CNR1	0.685929	0.347949	1.35221	0.27632
CNR2	0.912582	0.141848	5.87113	0.923271
CNTF	1.50853	0.545747	4.16983	0.428041
CR2	1.34665	0.877271	2.06716	0.173474
CRH	0.658053	0.0927535	4.66864	0.675506
CRHBP	0.517767	0.304872	0.879328	0.0148568
CRLF2	0.969871	0.401973	2.34008	0.945725
CRP	1.18174	1.00238	1.39319	0.0467794
CSF1	1.62528	1.16412	2.26911	0.0043375
CSF1R	1.04693	0.837883	1.30813	0.686547
CSPG4	0.918658	0.751936	1.12235	0.406346
CSRP3	0.834943	0.181724	3.8362	0.816645
CST7	1.07544	0.913258	1.26643	0.383188
CTNNBIP1	0.893758	0.48291	1.65415	0.72064
CTSC	0.939792	0.649458	1.35992	0.741879
CTSS	0.892022	0.723327	1.10006	0.285366
CUEDC2	0.946134	0.585297	1.52943	0.821227
CX3CL1	0.646733	0.519685	0.804841	9.39947e-05
CX3CR1	0.84052	0.690404	1.02328	0.0834971
CXCL1	1.24572	1.08158	1.43476	0.0023043
CXCL2	1.26604	1.07455	1.49165	0.00481188
CXCL3	1.61207	1.00114	2.59579	0.0494533
CXCL5	1.18975	1.05653	1.33977	0.00413785
CXCL9	1.0156	0.886581	1.16341	0.823251
CXCL10	1.04699	0.909307	1.20551	0.523273
CXCL13	1.27214	1.11401	1.45272	0.00037927
CXCL17	1.36366	0.527874	3.52273	0.521817
CXCR2	0.565374	0.26453	1.20836	0.141138
CXCR3	1.15019	0.941792	1.40471	0.170074
CXCR6	1.24442	0.928387	1.66804	0.143505
CYBA	1.39192	1.06435	1.8203	0.0157139
CYBB	0.943327	0.789437	1.12722	0.520825
CYLD	0.883573	0.552448	1.41317	0.60543
CYP19A1	1.8104	0.192133	17.0587	0.604023
CYP26B1	0.787423	0.55323	1.12076	0.184519
CYSLTR1	0.535304	0.304202	0.941975	0.030214
DAB2IP	0.459784	0.3263	0.647874	8.96709e-06
DAGLA	1.1512	0.639618	2.07194	0.638655
DAGLB	1.61965	0.812351	3.22924	0.170791
DDT	1.1525	0.787577	1.68651	0.464983
DDX3X	0.725877	0.50797	1.03726	0.0785615
DHX9	0.528792	0.350964	0.796723	0.00231497
DICER1	0.693307	0.449926	1.06834	0.0968528
DNASE1	1.09019	0.802329	1.48132	0.580934
DNASE1L3	0.62081	0.450959	0.854635	0.00346541
DPEP1	0.932448	0.775757	1.12079	0.456192
DROSHA	0.627988	0.337756	1.16762	0.141496
DUOXA1	2.20572	0.856643	5.67937	0.101149
DUOXA2	0.831384	0.059322	11.6517	0.89096
DUSP10	1.33641	0.937108	1.90585	0.109316
ECM1	1.39461	1.12767	1.72474	0.00215211
EDNRA	0.963435	0.755377	1.2288	0.764103
EDNRB	0.664008	0.563417	0.78256	1.03291e-06
EGFR	0.824264	0.641623	1.05889	0.130481
EIF2AK1	1.75527	0.866728	3.55472	0.118124
ELANE	1.00045	0.599885	1.6685	0.998618
ELF3	1.07953	0.854604	1.36366	0.520905
ENPP3	0.895871	0.801062	1.0019	0.0540191
EPHA2	0.824953	0.658455	1.03355	0.0943213
EPHB6	1.03113	0.708808	1.50003	0.872645
EPHX2	0.637441	0.501842	0.809681	0.000224283
ESR1	0.740767	0.377729	1.45273	0.382542
ETS1	0.766853	0.627159	0.937664	0.00967373
EXT1	1.10444	0.637266	1.9141	0.723289
F2	1.12836	0.961387	1.32433	0.139402
F2R	0.895387	0.724837	1.10607	0.305405
F2RL1	0.792136	0.665058	0.943495	0.00900369
F3	1.4097	1.16306	1.70865	0.000466483
F8	0.709819	0.558689	0.901831	0.00501838
F12	1.24778	0.982922	1.58402	0.0689938
FABP4	0.910292	0.795901	1.04112	0.170132
FANCA	3.21535	1.74315	5.93091	0.00018483
FANCD2	5.25818	2.75806	10.0246	4.61706e-07
FCER1A	0.750435	0.590466	0.953744	0.018918
FCER1G	1.18334	0.94784	1.47736	0.13706
FCGR2B	1.40278	1.01195	1.94454	0.0422277
FEM1A	0.720646	0.170907	3.03868	0.655451
FFAR2	1.1395	0.468595	2.77097	0.773319
FFAR3	3.02341	0.184427	49.5641	0.438152
FFAR4	0.658409	0.359874	1.20459	0.175096
FGFR1	0.914053	0.632155	1.32166	0.632898
FN1	1.08432	0.903068	1.30194	0.385708
FNDC4	1.17921	0.967078	1.43787	0.103288
FOXF1	1.22746	0.88044	1.71126	0.226706
FOXP3	1.5363	1.16258	2.03015	0.00253434
FPR1	0.968277	0.762156	1.23014	0.791808
FPR2	1.02469	0.519864	2.01972	0.943846
FPR3	0.880173	0.72524	1.06821	0.196339
FUT7	1.83371	0.664562	5.05972	0.241646
GAL	1.71396	1.18448	2.48013	0.00426308
GATA3	1.20187	0.975816	1.48029	0.0836873
GBP5	1.13872	0.948284	1.36741	0.164144
GGT1	0.887007	0.768058	1.02438	0.102652
GGT5	1.18938	0.939729	1.50535	0.149072
GHRL	2.80528	1.34433	5.85395	0.00598977
GHSR	1.83852	0.420291	8.04244	0.418653
GJA1	0.893543	0.726652	1.09876	0.285933
GPER1	0.850335	0.697251	1.03703	0.109394
GPR4	0.865593	0.696497	1.07574	0.193059
GPR17	1.49218	0.911332	2.44325	0.111631
GPR33	0.456907	0.0221481	9.42582	0.612007
GPRC5B	0.67785	0.521099	0.881754	0.00375754
GPS2	1.73606	1.27103	2.37123	0.000525259
GPSM3	1.31338	0.99652	1.731	0.0529635
GPX1	1.23473	0.949065	1.60638	0.116284
GPX2	1.29583	1.05982	1.5844	0.0115253
GPX4	1.0939	0.795946	1.5034	0.580112
GRN	0.880291	0.623464	1.24291	0.468802
GSDMD	1.48269	0.964548	2.27917	0.0725869
GSTP1	1.01069	0.80442	1.26986	0.927222
HAMP	2.0196	1.46152	2.79078	2.04781e-05
HAVCR2	0.943651	0.800156	1.11288	0.49073
HCK	1.01249	0.768566	1.33382	0.929689
HDAC5	0.610364	0.407173	0.914953	0.0168347
HDAC7	1.26686	0.797856	2.01157	0.316008
HDAC9	0.525839	0.230673	1.1987	0.126296
HGF	1.36538	1.05546	1.76629	0.017746
HIF1A	0.928619	0.661228	1.30414	0.669082
HK1	0.811599	0.533102	1.23558	0.330322
HMGB1	0.708063	0.344098	1.45701	0.34842
HMGB2	2.50823	1.48479	4.23712	0.000586975
HMOX1	0.881647	0.753922	1.03101	0.114681
HNRNPA0	0.429097	0.222184	0.828701	0.0117524
HP	1.1192	1.00692	1.244	0.0368199
HPS1	0.891496	0.524699	1.5147	0.671071
HRH4	6.56842	0.0115726	3728.12	0.560726
HSPD1	0.971026	0.619944	1.52093	0.897813
HYAL1	0.583797	0.448811	0.759382	6.03082e-05
HYAL2	0.677464	0.517325	0.887174	0.00465487
HYAL3	1.6481	0.882931	3.07639	0.116654
ICAM1	1.07042	0.844745	1.35638	0.573231
IDO1	1.00904	0.840285	1.21168	0.923245
IER3	1.2873	1.07522	1.54121	0.00596659
IFNG	1.34071	1.0186	1.76468	0.0364916
IFNGR1	0.653231	0.394232	1.08239	0.0983915
IFNGR2	1.2961	0.825682	2.03451	0.25959
IGF1	0.974758	0.442468	2.1474	0.949415
IGHG1	1.12149	1.03004	1.22107	0.00824344
IL1A	1.16898	0.203553	6.71326	0.861029
IL1B	1.20702	0.892395	1.63256	0.222049
IL1F10	3051765449368000	330993	2.81373e+25	0.00232172
IL1R1	1.17167	0.879371	1.56112	0.279247
IL1R2	1.08079	0.936628	1.24715	0.28748
IL1RAP	1.1879	0.767232	1.83921	0.440121
IL1RL1	0.861685	0.675016	1.09997	0.232072
IL1RL2	0.714272	0.505336	1.0096	0.0566662
IL1RN	1.42991	1.0496	1.94803	0.0234023
IL2	4.24096	0.520732	34.5393	0.17696
IL2RA	1.40217	1.08387	1.81395	0.010082
IL4	85.2583	15.3203	474.468	3.85e-07
IL5RA	8.32493	0.261231	265.3	0.230169
IL6	1.2276	1.07718	1.39902	0.00210703
IL10	1.35902	0.771789	2.39306	0.287948
IL12B	0.482725	0.154883	1.50451	0.209222
IL13	15.9923	0.730348	350.179	0.0783381
IL16	0.928611	0.629354	1.37016	0.709013
IL17A	0.00453447	1.31187e-12	1.56734e+07	0.630141
IL17B	1.43491	0.830274	2.47986	0.195794
IL17C	6.5	0.515234	82.0016	0.147829
IL17D	6.21409	1.54468	24.9987	0.0101057
IL17F	1.06097	0.0170264	66.1124	0.977605
IL17RA	0.885683	0.503602	1.55765	0.673436
IL17RB	0.888873	0.748663	1.05534	0.178629
IL17RC	1.54343	0.933512	2.55184	0.0906892
IL17RE	1.09548	0.6934	1.73071	0.69594
IL18	0.982351	0.76212	1.26622	0.890647
IL18R1	0.881311	0.640318	1.213	0.438225
IL18RAP	1.13716	0.689714	1.87489	0.614374
IL20RB	1.17474	1.06693	1.29344	0.00104196
IL22	123193	154.282	9.8369e+07	0.000586506
IL22RA2	7.49923	1.94987	28.8421	0.0033725
IL23A	2.48896	1.46074	4.24093	0.000797557
IL23R	1.3866	0.098225	19.5739	0.808792
IL25	229.431	0.00318673	1.6518e+07	0.340822
IL27	5.41127	1.79296	16.3315	0.00273591
IL31RA	7.58862	3.30777	17.4097	1.72208e-06
IL33	0.927342	0.711437	1.20877	0.576958
IL34	1.34513	1.03736	1.7442	0.0253075
IRAK2	0.8834	0.592813	1.31643	0.542424
IRF3	2.42846	1.55359	3.79599	9.8978e-05
ISL1	9.14982	2.60466	32.1421	0.000553771
ITGA2	0.63785	0.464031	0.876778	0.00560429
ITGAM	0.980965	0.724032	1.32907	0.901293
ITGAV	0.658526	0.51183	0.847266	0.00115818
ITGB1	0.715733	0.551835	0.92831	0.0117151
ITGB2	0.995764	0.805064	1.23164	0.968784
ITGB6	1.10417	0.895298	1.36176	0.354339
ITIH4	2.36799	1.34655	4.16426	0.00276208
JAK2	0.721557	0.471134	1.10509	0.133483
JAM3	0.77487	0.585051	1.02628	0.0752301
JUN	0.944488	0.749819	1.1897	0.627694
KARS	0.769555	0.362734	1.63264	0.494871
KDM6B	0.78518	0.58555	1.05287	0.106148
KIT	0.78809	0.614647	1.01048	0.0604107
KL	0.746524	0.637742	0.873862	0.00027485
KLKB1	1.18799	0.880067	1.60364	0.260443
KNG1	1.04481	0.830333	1.31469	0.708442
KPNA6	0.624297	0.39071	0.997534	0.0488052
KRT1	0.400969	0.0839401	1.91537	0.252044
KRT16	1.36275	0.717595	2.58793	0.344231
LAT	4.05618	2.02874	8.10974	7.45727e-05
LBP	1.09712	1.01125	1.1903	0.025822
LDLR	0.996967	0.745224	1.33375	0.983682
LEP	1.015	0.34715	2.96768	0.978299
LGALS9	1.22724	0.915649	1.64488	0.170601
LIAS	0.712349	0.421266	1.20456	0.205677
LILRA5	1.18207	0.819197	1.70569	0.371306
LIPA	0.592363	0.45473	0.771652	0.000103843
LOXL3	1.27509	1.00203	1.62257	0.0481001
LPL	0.82147	0.657112	1.02694	0.084239
LRFN5	1.10615	0.710111	1.72305	0.655516
LRP1	1.03825	0.797124	1.35233	0.780699
LRRC19	0.761211	0.634952	0.912577	0.0031921
LRRK2	0.716536	0.596295	0.861023	0.000375796
LTA	1.60074	1.0383	2.46786	0.0331592
LTB4R2	1.95498	1.20463	3.17273	0.00665701
LXN	1.07026	0.706935	1.62031	0.748287
LY86	0.956552	0.756534	1.20945	0.710542
LY96	1.21134	0.972509	1.50882	0.0870489
LYN	0.922717	0.656303	1.29728	0.643575
MAP2K3	0.984126	0.707831	1.36827	0.924185
MAPK8	0.460043	0.244929	0.864087	0.0157707
MAPK14	0.646349	0.392736	1.06374	0.085999
MAPKAPK2	1.10523	0.642842	1.90021	0.717449
MAS1	3.70694	0.375627	36.5826	0.261994
MCPH1	0.425322	0.202617	0.892814	0.023844
MDK	1.4311	1.22428	1.67284	6.76401e-06
MECOM	0.694777	0.501947	0.961686	0.028128
MEFV	1.2739	0.702444	2.31026	0.425408
MEP1B	2.8264	0.0321262	248.661	0.649216
METRNL	1.23697	0.956641	1.59945	0.104825
MFHAS1	0.764115	0.538645	1.08396	0.131543
MGLL	0.659034	0.443651	0.97898	0.0389062
MIF	1.08505	0.847916	1.3885	0.516498
MIR324	1.30781	0.967801	1.76726	0.080653
MMP8	1.72291	0.696584	4.26138	0.239029
MMP25	1.17598	0.652762	2.11857	0.589383
MS4A2	0.451663	0.2395	0.851774	0.0140637
MUC19	0.487783	0.00159632	149.051	0.805767
MVK	1.06126	0.795693	1.41546	0.685755
MYD88	0.931797	0.631979	1.37385	0.721392
MYLK3	0.121529	0.00240761	6.13438	0.292169
NAMPT	1.06092	0.775241	1.45188	0.711773
NAPEPLD	0.528306	0.318368	0.876681	0.0135384
NCF1	1.01267	0.681268	1.50527	0.950371
NDFIP1	0.466935	0.271655	0.802592	0.00585671
NDST1	0.686062	0.501721	0.938132	0.0182762
NDUFC2	0.93826	0.560923	1.56944	0.808164
NDUFS4	0.457739	0.27678	0.757009	0.00233051
NFE2L1	0.570181	0.361125	0.900259	0.0159149
NFE2L2	0.543662	0.341471	0.865575	0.0102182
NFKB1	0.509752	0.359334	0.723134	0.000158769
NFKBIA	0.825796	0.626125	1.08914	0.175313
NFKBID	1.2037	0.941989	1.53812	0.138289
NFKBIZ	1.47445	1.19279	1.82262	0.000330809
NLRC3	0.964541	0.610655	1.52351	0.876983
NLRC4	0.91179	0.55011	1.51126	0.720195
NLRP3	0.843004	0.53458	1.32937	0.462412
NLRP6	0.678482	0.500076	0.920536	0.0127074
NLRP10	3708.71	96.042	143214	1.03995e-05
NLRP12	0.846219	0.185696	3.85623	0.829157
NLRX1	0.673396	0.389233	1.16501	0.157404
NOD2	1.74175	1.19629	2.53591	0.00379078
NOS2	0.77328	0.515527	1.1599	0.213907
NOTCH1	0.841908	0.628297	1.12814	0.249127
NOTCH2	0.916583	0.683739	1.22872	0.560229
NPPA	4.32004	1.25499	14.8708	0.0203361
NPY5R	1.17529	0.572312	2.41355	0.659994
NR1D1	1.00485	0.766741	1.3169	0.972039
NR1D2	0.70949	0.516033	0.975473	0.0346146
NR1H3	1.28381	0.80011	2.05991	0.300401
NR1H4	0.923192	0.748636	1.13845	0.454844
NRROS	0.763447	0.537853	1.08366	0.130953
NT5E	0.896891	0.69016	1.16555	0.41563
NUPR1	1.24536	1.01658	1.52563	0.034111
ODAM	1.37638	0.757347	2.50139	0.294593
OLR1	1.03593	0.841755	1.2749	0.738883
ORM1	1.28174	0.869145	1.89019	0.210438
ORM2	1.6418	1.13339	2.37825	0.00873544
OSM	1.24359	0.977941	1.58141	0.0753977
OTULIN	1.22845	0.720916	2.09329	0.449276
P2RX1	1.29433	0.751806	2.22834	0.351979
P2RX7	0.989217	0.700112	1.3977	0.950982
PARK7	1.76363	0.942582	3.29985	0.075902
PARP4	0.600721	0.434863	0.829838	0.00199183
PBK	2.07326	1.51475	2.8377	5.28829e-06
PDCD4	0.616795	0.379835	1.00158	0.0507519
PDE2A	0.655642	0.51042	0.842182	0.000951526
PDE5A	0.76067	0.535434	1.08065	0.126763
PER1	0.87001	0.691123	1.0952	0.23575
PF4	1.85362	1.13184	3.03567	0.0142055
PGLYRP1	0.69922	0.277466	1.76205	0.448023
PGLYRP2	1.53942	0.978309	2.42235	0.0621602
PIK3AP1	0.934763	0.752616	1.16099	0.541823
PIK3CD	1.33359	0.932421	1.90736	0.114859
PIK3CG	0.742365	0.518341	1.06321	0.10405
PJA2	0.591529	0.427905	0.817721	0.00148298
PLA2G2D	1.2039	0.992911	1.45972	0.0590807
PLA2G3	0.775271	0.153015	3.92802	0.758501
PLA2G4A	0.754874	0.516267	1.10376	0.146872
PLA2G5	0.847172	0.462255	1.55261	0.591545
PLA2G7	0.850554	0.680631	1.0629	0.154587
PLA2G10	0.160806	0.0174987	1.47775	0.106335
PLAA	0.505242	0.290567	0.878523	0.0155709
PLD3	0.798012	0.523352	1.21682	0.294517
PLD4	0.902155	0.654919	1.24272	0.52861
PLGRKT	1.05133	0.667882	1.65492	0.828808
PLP1	2.63647	0.818171	8.49572	0.104415
PMP22	1.02557	0.797921	1.31817	0.843694
PNMA1	0.919254	0.582506	1.45068	0.717577
POLB	1.50592	0.75831	2.9906	0.242165
PPARA	0.605237	0.392725	0.932745	0.0228779
PPARD	1.00706	0.718356	1.41179	0.967454
PPARG	0.458725	0.296803	0.708985	0.000451169
PPBP	1.055	0.68297	1.62968	0.809307
PRCP	0.484858	0.323448	0.726816	0.000456891
PRDX2	0.759259	0.581633	0.991129	0.0428167
PRKCA	1.13565	0.84054	1.53437	0.407369
PRKCQ	0.916918	0.657117	1.27943	0.609856
PRKCZ	0.312222	0.180638	0.539656	3.05631e-05
PRKD1	0.546307	0.380151	0.785084	0.00108381
PROC	0.96092	0.731042	1.26308	0.775062
PSEN1	0.440555	0.243934	0.795659	0.00657062
PSMA1	2.66521	1.3137	5.40714	0.00660978
PSMB4	2.27456	1.38894	3.72487	0.00109286
PSTPIP1	1.41267	1.07111	1.86316	0.0144301
PTAFR	0.937018	0.734037	1.19613	0.601505
PTGDR	1.34567	0.704459	2.57051	0.368614
PTGER1	1.28576	0.826325	2.00065	0.265162
PTGER2	1.08252	0.770193	1.5215	0.648002
PTGER3	0.96597	0.83604	1.11609	0.638528
PTGER4	0.870103	0.625054	1.21122	0.409669
PTGFR	1.26234	0.970926	1.64121	0.0819226
PTGIR	1.36413	0.949013	1.96083	0.0934863
PTGIS	1.1489	0.978914	1.34841	0.0893006
PTGS1	0.936014	0.8052	1.08808	0.389288
PTGS2	1.23698	1.00795	1.51804	0.0417773
PTN	0.954756	0.816264	1.11674	0.56256
PTPN2	2.36254	1.1502	4.85271	0.0192326
PXK	0.873276	0.623606	1.22291	0.430287
PYCARD	1.47348	1.17693	1.84475	0.000722692
RABGEF1	1.35145	0.565333	3.2307	0.4982
RARRES2	1.08457	0.899699	1.30744	0.39451
RASGRP1	0.818108	0.620481	1.07868	0.154709
RB1	0.560966	0.387026	0.813079	0.00226829
RBPJ	0.833474	0.430819	1.61246	0.588507
REG3A	1.65863	1.03618	2.65501	0.0350292
REG3G	1.3229	1.00968	1.73328	0.0423691
REL	0.496822	0.251114	0.982948	0.0444982
RELA	1.50558	0.726077	3.12194	0.27147
RELB	1.47218	0.929649	2.33133	0.0991601
RHBDD3	2.85021	1.82153	4.45982	4.53668e-06
RICTOR	0.851487	0.506905	1.43031	0.543496
RIPK1	0.617513	0.385516	0.989122	0.044913
RORA	0.430889	0.285558	0.650183	6.04856e-05
RPS6KA4	1.60477	0.968728	2.65842	0.0662696
RPS6KA5	0.210649	0.0473327	0.937466	0.0408809
RPS19	1.49785	1.09042	2.05752	0.012618
RTN4	0.736545	0.444431	1.22066	0.235475
S1PR3	1.10865	0.878163	1.39964	0.385729
S100A7A	11.7701	4.19889e-05	3.29935e+06	0.700054
S100A8	1.12537	0.923087	1.37197	0.242681
S100A9	1.04526	0.868	1.25873	0.640572
SAA1	1.11246	1.03941	1.19065	0.0021037
SAA2	1.1404	1.02193	1.27262	0.0188996
SAA4	1.38348	1.09952	1.74076	0.00561547
SBNO2	1.6439	1.11462	2.4245	0.0121643
SCGB1A1	2.51015	0.421802	14.9379	0.31184
SCN9A	0.962125	0.739316	1.25208	0.773898
SCYL1	1.84785	0.772143	4.42218	0.167847
SCYL3	1.06265	0.46623	2.42203	0.885054
SDC1	0.96659	0.79478	1.17554	0.733626
SEH1L	0.849872	0.460122	1.56976	0.603337
SELE	0.756304	0.505826	1.13082	0.173533
SELENOS	1.15388	0.591453	2.25113	0.674657
SELP	0.692954	0.523444	0.917356	0.0103886
SEMA7A	1.80703	1.33164	2.45214	0.000145392
SERPINB9	1.28725	0.908248	1.82439	0.15587
SERPINE1	1.08904	0.958134	1.23783	0.191749
SERPINF1	1.3532	1.15582	1.58427	0.000169725
SERPINF2	0.955755	0.831953	1.09798	0.522592
SETD6	2.0938	1.17102	3.74373	0.0126862
SGMS1	0.339992	0.21272	0.543413	6.51393e-06
SHARPIN	1.81751	1.14566	2.88335	0.0111656
SHPK	1.68643	0.79583	3.57368	0.172584
SIGIRR	1.02559	0.724375	1.45206	0.886742
SIRPA	1.07793	0.837153	1.38797	0.560668
SLAMF1	1.3808	0.875529	2.17767	0.165104
SLAMF8	1.15529	0.944166	1.41362	0.160925
SLC7A2	1.09648	0.910461	1.32051	0.331531
SLC11A1	1.71067	1.23567	2.36826	0.00121614
SLIT2	0.950845	0.743408	1.21616	0.688117
SMAD3	0.779228	0.480293	1.26422	0.312328
SMO	1.25587	0.899097	1.75422	0.181495
SMPDL3B	1.02058	0.785607	1.32584	0.878715
SNAP23	0.589881	0.33597	1.03569	0.0660813
SNCA	0.809532	0.550257	1.19097	0.283405
SNX4	0.591261	0.394365	0.886463	0.0109837
SOCS3	1.33914	1.12453	1.5947	0.00104904
SOCS5	0.760215	0.494748	1.16813	0.21097
SOD1	1.23541	0.727648	2.09748	0.433777
SPATA2	0.806949	0.395292	1.64731	0.555796
SPHK1	1.60887	1.21486	2.13066	0.000906696
SPN	0.867366	0.649772	1.15783	0.334262
STAB1	1.20443	0.915468	1.5846	0.183865
STAP1	0.973021	0.826902	1.14496	0.741831
STARD7	0.505599	0.274536	0.931134	0.0285988
STAT3	0.84906	0.544403	1.32421	0.470549
STAT5A	0.924625	0.61659	1.38655	0.704631
STAT5B	0.403305	0.255351	0.636986	9.86077e-05
STK39	1.09607	0.870129	1.38068	0.436073
SUCNR1	0.829497	0.663377	1.03722	0.101109
SYK	0.840718	0.647487	1.09162	0.192885
SYT11	0.834539	0.627687	1.10956	0.213276
TAC1	0.667757	0.232168	1.92059	0.453741
TAC4	2.02939	0.814755	5.05481	0.128517
TARM1	0.482138	0.000357298	650.597	0.842744
TBC1D23	0.723273	0.418756	1.24923	0.245283
TBXA2R	0.756511	0.544031	1.05198	0.0971687
TCIRG1	1.95963	1.45297	2.64295	1.04406e-05
TFF2	0.983867	0.705491	1.37209	0.923643
TGFB1	1.38924	1.01775	1.89634	0.0383797
TGM2	1.0634	0.876768	1.28977	0.532415
THBS1	0.855943	0.712643	1.02806	0.0961216
THEMIS2	1.24612	0.937008	1.65721	0.130363
TICAM1	0.762715	0.552004	1.05386	0.100596
TICAM2	1.07766	0.0819688	14.1683	0.954621
TIMP1	1.57104	1.27335	1.93832	2.5041e-05
TIRAP	0.282878	0.145315	0.550665	0.000202817
TLR1	0.910189	0.649635	1.27524	0.584443
TLR2	1.16391	0.88108	1.53753	0.285245
TLR3	0.745451	0.615407	0.902975	0.00266972
TLR4	0.642969	0.484742	0.852842	0.00218086
TLR5	1.00173	0.664508	1.51009	0.993402
TLR6	1.63923	0.969386	2.77194	0.0651891
TLR7	0.853442	0.65773	1.10739	0.233087
TLR8	0.890487	0.642361	1.23446	0.486422
TLR9	51.4858	0.0272529	97266.4	0.305844
TNF	1.08369	0.683956	1.71706	0.732134
TNFAIP3	0.829608	0.614574	1.11988	0.222341
TNFAIP6	0.9175	0.807518	1.04246	0.186281
TNFAIP8L2	1.31545	1.00134	1.72809	0.048884
TNFRSF1A	1.56287	0.96203	2.53898	0.0712929
TNFRSF1B	1.0939	0.815534	1.46728	0.549175
TNFRSF4	1.27227	0.967157	1.67363	0.0852044
TNFRSF11A	1.67755	1.07533	2.61704	0.0226046
TNFSF4	2.26698	1.46478	3.50852	0.000239791
TNFSF11	1.91264	1.19995	3.04862	0.00640484
TNFSF18	1.12285	0.559908	2.25179	0.744148
TNIP1	0.684417	0.493988	0.948254	0.022646
TNIP2	2.00289	1.18397	3.38822	0.00960983
TOLLIP	0.412503	0.258609	0.657979	0.000201607
TPSB2	0.789693	0.649668	0.959899	0.0177428
TRADD	0.901592	0.607367	1.33835	0.607263
TREM1	1.3828	1.06346	1.79803	0.0155522
TREM2	1.11742	0.920608	1.3563	0.261386
TRIL	0.799006	0.596125	1.07093	0.13325
TRIM55	0.783489	0.638514	0.961381	0.0194275
TRPV1	8.87314	0.527299	149.313	0.129612
TRPV4	0.784124	0.630343	0.975423	0.0290078
TSLP	3.12623	1.09523	8.92359	0.0331769
TSPAN2	1.00295	0.761103	1.32165	0.983291
TTBK1	1.14655	0.622783	2.1108	0.660535
TUSC2	1.09937	0.674633	1.7915	0.703774
TYRO3	3.13628	1.57649	6.23936	0.00112583
TYROBP	1.11118	0.89278	1.38302	0.345064
UACA	0.976884	0.711881	1.34054	0.884828
ULK4	1.89281	0.887003	4.03912	0.0989622
UMOD	0.935426	0.776628	1.12669	0.481897
UNC13D	1.76591	1.22855	2.53831	0.00212717
USP18	1.00008	0.638872	1.56551	0.999716
VAMP7	0.659451	0.375268	1.15884	0.147769
VAMP8	0.878628	0.604106	1.2779	0.498415
VNN1	0.994709	0.877498	1.12758	0.9339
VPS35	0.419079	0.248454	0.706882	0.00111238
WDR83	2.18385	1.27349	3.74497	0.00453185
WFDC1	0.922174	0.615069	1.38262	0.694988
WNT5A	2.03387	1.4042	2.94589	0.000172705
XCL1	1.65455	1.22108	2.24189	0.00115972
YWHAZ	0.859251	0.459757	1.60587	0.634482
ZC3H12A	1.154	0.89402	1.48959	0.271421
ZFP36	1.005	0.836255	1.2078	0.957582
ZP3	1.46571	1.0962	1.95977	0.00988938
